# Supplementary material for: Molecular and Morphological Toxicity of Diatom-Derived Hydroxyacid Mixtures to Sea Urchin Paracentrotus lividus Embryos
Source: PubMed Central journal article supplement (PMC6470663; doi:10.3390/md17030144), 2019-03-01
Supplement: marinedrugs-17-00144-s001.pdf [file marinedrugs-17-00144-s001.pdf]

## Supplementary Materials

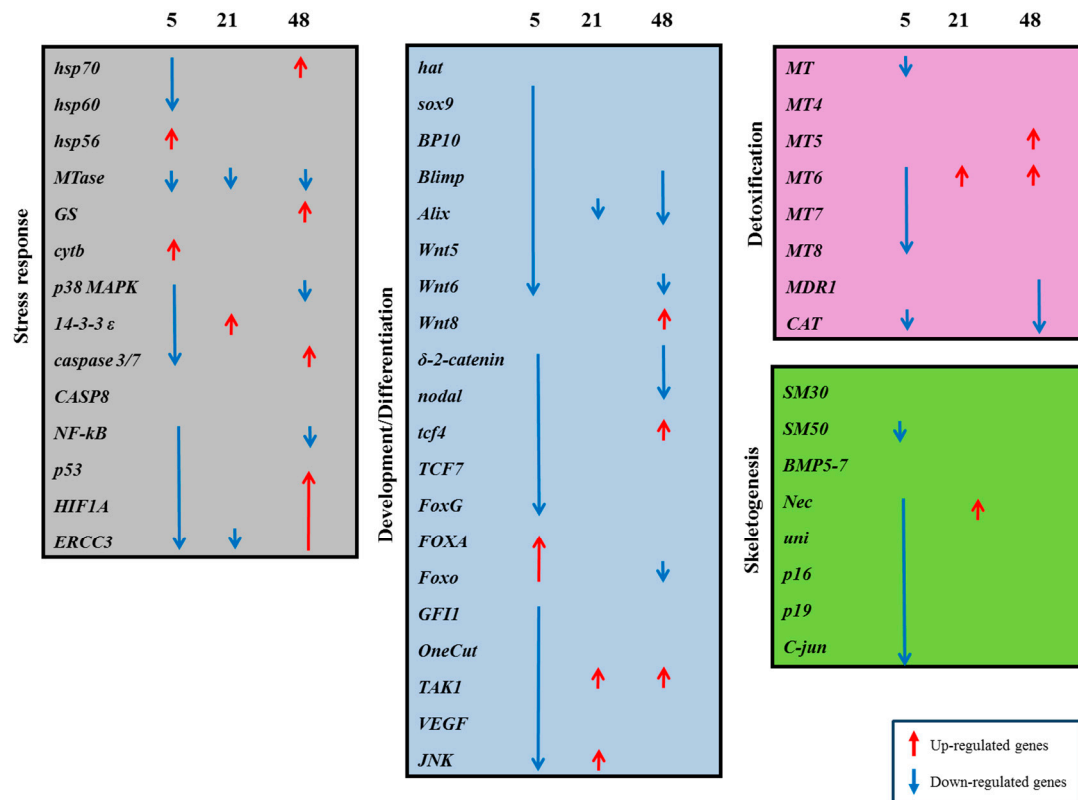

**Figure S1.** Synopsis of the patterns of up- and downregulation of different classes of genes in the sea urchin *P. lividus* in the presence of 5-, 9-, 11- and 15-HEPE mixture at 2.8  $\mu$ M.

**Table S1.** Data of expression levels were reported as a fold difference from control at blastula (5 hpf), gastrula (21 hpf) and pluteus (48 hpf) after treatment with 5- 9-, 11- and 15-HEPE mixture at 2.8  $\mu$ M. Fold differences greater than  $\pm 2$  were considered significant.

|                                      | Blastula | Gastrula | Pluteus |
|--------------------------------------|----------|----------|---------|
| <b>Stress Response</b>               |          |          |         |
| <i>hsp70</i>                         | -4.4     | 1.2      | 4.3     |
| <i>hsp60</i>                         | -3.3     | 0.7      | -0.2    |
| <i>hsp56</i>                         | 2.4      | 1.7      | 1.9     |
| <i>Mtase</i>                         | -4.0     | -2.1     | -3.0    |
| <i>GS</i>                            | 1.8      | 1.7      | 2.1     |
| <i>cytb</i>                          | 2.3      | 0.9      | 1.6     |
| <i>p38 MAPK</i>                      | -7.1     | -1.6     | -6.5    |
| <i>14-3-3E</i>                       | -6.7     | 2.6      | -1.6    |
| <i>caspase 3/7</i>                   | -2.8     | -0.6     | 2.3     |
| <i>caspase-8</i>                     | 0.6      | -1.3     | 1.3     |
| <i>NF-KB</i>                         | -2.0     | 0.5      | -2.9    |
| <i>P53</i>                           | -7.5     | 0.0      | 2.4     |
| <i>HIF1A</i>                         | -3.4     | 1.7      | 2.5     |
| <i>ERCC3</i>                         | -2.9     | -3.0     | 3.7     |
| <b>Skeletogenesis</b>                |          |          |         |
| <i>SM30</i>                          | 0.0      | 0.0      | -0.9    |
| <i>SM50</i>                          | -4.5     | 0.3      | -0.1    |
| <i>BMP5/7</i>                        | -2.0     | 1.4      | 1.0     |
| <i>Nec</i>                           | -2.7     | 2.2      | 1.2     |
| <i>uni</i>                           | -2.5     | 1.5      | -1.8    |
| <i>p16</i>                           | -2.2     | 0.4      | 0.3     |
| <i>p19</i>                           | -3.0     | 0.7      | 0.4     |
| <i>Jun</i>                           | -2.3     | 0.7      | 0.7     |
| <b>Development/Differentiation</b>   |          |          |         |
| <i>hat</i>                           | -0.9     | -1.3     | -0.7    |
| <i>sox9</i>                          | -3.5     | -1.2     | 1.9     |
| <i>BP10</i>                          | -2.1     | 1.1      | 1.4     |
| <i>Blimp</i>                         | -2.6     | -0.1     | -6.5    |
| <i>Alix</i>                          | -3.8     | -3.8     | -4.5    |
| <i>Wnt5</i>                          | -2.7     | 0.0      | -1.2    |
| <i>Wnt6</i>                          | -2.8     | -0.5     | -2.5    |
| <i>Wnt8</i>                          | 1.2      | 0.6      | 2.0     |
| <i><math>\delta</math>-2-catenin</i> | -2.3     | 1.8      | -2.6    |
| <i>Nodal</i>                         | -2.5     | 1.1      | -4.6    |
| <i>tcf4</i>                          | -5.2     | -1.1     | 3.1     |
| <i>TCF7</i>                          | -2.0     | 0.3      | -1.8    |
| <i>FoxG</i>                          | -3.2     | -0.5     | -1.2    |
| <i>FoxA</i>                          | 3.5      | 0.5      | -1.2    |
| <i>Fox0</i>                          | 4.1      | 1.0      | -3.0    |
| <i>GFI1</i>                          | -2.5     | 0.7      | -0.6    |

|                |      |      |      |
|----------------|------|------|------|
| <i>Onecut</i>  | -2.1 | 1.2  | 0.7  |
| <i>TAK1</i>    | -3.5 | 3.9  | 5.0  |
| <i>VEGF</i>    | -2.2 | -0.9 | -1.8 |
| <i>JNK</i>     | -3.0 | 2.0  | -0.5 |
| <hr/>          |      |      |      |
| Detoxification |      |      |      |
| <i>MT</i>      | -2.8 | 0.5  | 0.2  |
| <i>MT4</i>     | -1.7 | 0.7  | -1.7 |
| <i>MT5</i>     | -0.4 | 1.2  | 2.3  |
| <i>MT6</i>     | -3.8 | 2.1  | 2.0  |
| <i>MT7</i>     | -2.7 | 0.7  | -0.8 |
| <i>MT8</i>     | -8.3 | 1.7  | -1.8 |
| <i>MDRI</i>    | 0.1  | 1.6  | -6.0 |
| <i>CAT</i>     | -2.5 | 0.6  | -4.9 |
